# Supplementary material for: Tirzepatide is an imbalanced and biased dual GIP and GLP-1 receptor agonist
Source: JCI journal article supplement (doi:10.1172/jci.insight.140532), 2020-07-30
Supplement: sd1 [file 1]

## Supplemental Information – Table & Figures

### Tirzepatide is an Imbalanced and Biased Dual GIP/GLP-1 Receptor Agonist

| Ligand | [ <sup>125</sup> I]GIP Binding             |                                      | GIPR Low Density cAMP             |                                 |                                        | GIPR Medium Density cAMP          |                                 |                                        | GIPR High Density cAMP            |                                 |                                        |
|--------|--------------------------------------------|--------------------------------------|-----------------------------------|---------------------------------|----------------------------------------|-----------------------------------|---------------------------------|----------------------------------------|-----------------------------------|---------------------------------|----------------------------------------|
|        | K <sub>i</sub> nM <sup>A</sup><br>(SEM, n) | K <sub>i</sub> <sup>B</sup><br>Ratio | Rec/Cell <sup>C</sup><br>(SEM, n) | EC <sub>50</sub> nM<br>(SEM, n) | EC <sub>50</sub> <sup>D</sup><br>Ratio | Rec/Cell <sup>C</sup><br>(SEM, n) | EC <sub>50</sub> nM<br>(SEM, n) | EC <sub>50</sub> <sup>D</sup><br>Ratio | Rec/Cell <sup>C</sup><br>(SEM, n) | EC <sub>50</sub> nM<br>(SEM, n) | EC <sub>50</sub> <sup>D</sup><br>Ratio |
| GIP    | 0.203<br>(0.033, 12)                       | 1.00                                 |                                   | 0.888<br>(0.114, 49)            | 1.00                                   |                                   | 0.0461<br>(0.0084, 12)          | 1.00                                   |                                   | 0.00224<br>(0.00040, 6)         | 1.00                                   |
| Tzp    | 0.163<br>(0.029, 6)                        | 1.25                                 | 1,700<br>(500, 5)                 | 1.01<br>(0.15, 23)              | 0.88                                   | 6,400<br>(900, 6)                 | 0.0536<br>(0.0157, 8)           | 0.86                                   | 86,000<br>(29,000, 6)             | 0.00196<br>(0.00019, 2)         | 1.14                                   |
| Sema   | >500<br>(ND, 2)                            | ND                                   |                                   | >850<br>(ND, 10)                | ND                                     |                                   | >100<br>(ND, 2)                 | ND                                     |                                   | 80.3<br>(16.1, 2)               | 0.00                                   |

| Ligand | [ <sup>125</sup> I]GLP-1 Binding           |                                      | GLP-1R Low Density cAMP           |                                 |                                        | GLP-1R Medium Density cAMP        |                                 |                                        | GLP-1R High Density cAMP          |                                 |                                        |
|--------|--------------------------------------------|--------------------------------------|-----------------------------------|---------------------------------|----------------------------------------|-----------------------------------|---------------------------------|----------------------------------------|-----------------------------------|---------------------------------|----------------------------------------|
|        | K <sub>i</sub> nM <sup>A</sup><br>(SEM, n) | K <sub>i</sub> <sup>B</sup><br>Ratio | Rec/Cell <sup>C</sup><br>(SEM, n) | EC <sub>50</sub> nM<br>(SEM, n) | EC <sub>50</sub> <sup>D</sup><br>Ratio | Rec/Cell <sup>C</sup><br>(SEM, n) | EC <sub>50</sub> nM<br>(SEM, n) | EC <sub>50</sub> <sup>D</sup><br>Ratio | Rec/Cell <sup>C</sup><br>(SEM, n) | EC <sub>50</sub> nM<br>(SEM, n) | EC <sub>50</sub> <sup>D</sup><br>Ratio |
| GLP-1  | 0.655<br>(0.055, 12)                       | 1.00                                 |                                   | 0.366<br>(0.032, 57)            | 1.00                                   |                                   | 0.0721<br>(0.0061, 24)          | 1.00                                   |                                   | 0.00624<br>(0.00056, 14)        | 1.00                                   |
| Tzp    | 2.94<br>(0.33, 6)                          | 0.22                                 | 1,400<br>(200, 5)                 | 6.54<br>(0.71, 22)              | 0.06                                   | 7,800<br>(1,300, 6)               | 1.38<br>(0.19, 11)              | 0.05                                   | 76,000<br>(10,000, 7)             | 0.132<br>(0.006, 9)             | 0.05                                   |
| Sema   | 1.10<br>(0.28, 5)                          | 0.60                                 |                                   | 0.364<br>(0.068, 9)             | 1.01                                   |                                   | 0.0571<br>(0.0117, 4)           | 1.26                                   |                                   | 0.00671<br>(0.00042, 3)         | 0.93                                   |

**Supplemental Table 1. *In Vitro* Activity of Tirzepatide in Transgenic Cell Lines with Varying Receptor Densities.** <sup>A</sup> Affinities were calculated from competition binding data using the Cheng-Prusoff correction (*Biochem Pharmacol.* 1973;22(23):3099-108). <sup>B</sup> Calculated by ratio of native ligand K<sub>i</sub> to test ligand K<sub>i</sub>. <sup>C</sup> Receptors per cell calculated by radioligand binding B<sub>MAX</sub> determinations. <sup>D</sup> Calculated by ratio of native ligand EC<sub>50</sub> to test ligand EC<sub>50</sub>.

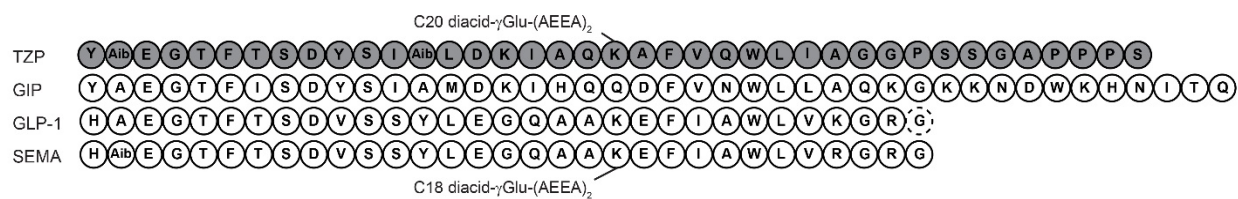

**Supplemental Figure 1. Multiple Sequence Alignment of Ligands.** Depicted is an amino acid sequence comparison of tirzepatide (TZP), human GIP(1-42), human GLP-1(7-36), and semaglutide (SEMA). For tirzepatide and semaglutide, the locations of the engineered acyl moieties are indicated. The dotted circle at the end of the GLP-1 sequence represents the terminal glycine residue that is present in the naturally occurring GLP-1(7-37) variant.

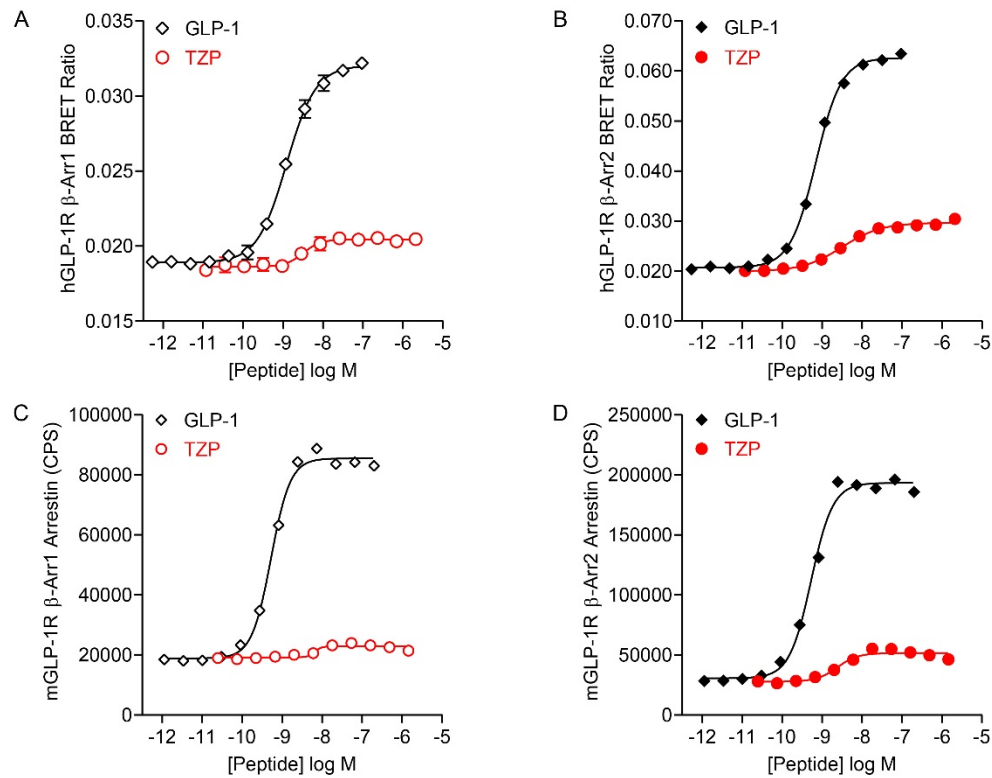

**Supplemental Figure 2.  $\beta$ -Arrestin1 and  $\beta$ -Arrestin2 Recruitment to the GLP-1 Receptor.** Arrestin recruitment was measured using bioluminescence resonance energy transfer (BRET) and NanoLuciferase complementation (NanoLuc). **(A)** Recruitment of  $\beta$ -Arr1 to human GLP-1R using BRET. EC<sub>50</sub> values and efficacy relative to GLP-1: GLP-1 (1.3 nM, 100%) Tzp (3.1 nM, 12%) **(B)** Recruitment of  $\beta$ -Arr2 to human GLP-1R using BRET. EC<sub>50</sub> values and efficacy relative to: GLP-1 (0.7 nM, 100%), Tzp (3.2 nM, 23%) **(C)** Recruitment of  $\beta$ -Arr1 to mouse GLP-1R using NanoLuc complementation. EC<sub>50</sub> values and efficacy relative to GLP-1: (0.53 nM, 100%), Tzp (6.6 nM, 6%) **(D)** Recruitment of  $\beta$ -Arr2 to mouse GLP-1R using NanoLuc complementation. EC<sub>50</sub> values and efficacy relative to GLP-1: GLP-1 (0.53 nM, 100%), Tzp (2.4 nM, 15%).

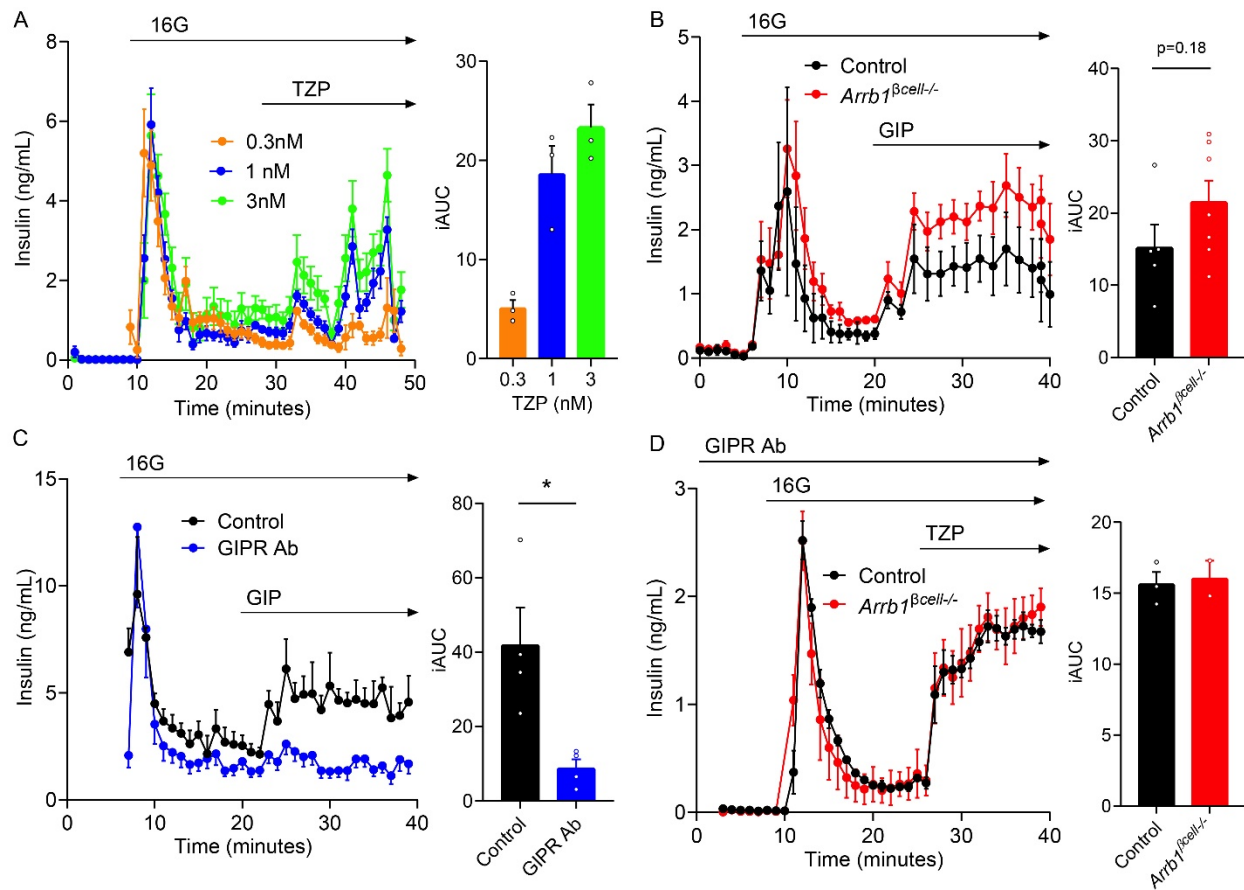

**Supplemental Figure 3. Insulin Secretion in Perfused Islets.** (A) Tirzepatide (TZIP) enhances glucose stimulated insulin secretion from normal islets (wild-type male) in a concentration-dependent manner. Integrated area under the curve (iAUC) is determined from 25-39 minutes. (B) Insulin secretion in response to GIP is similar in control and *Arrb1* <sup>$\beta$ cell-/-</sup> islets. iAUC is determined from 20-40 minutes. (C) GIP stimulated insulin secretion is prevented by a GIPR antagonist. iAUC is determined from 21-39 minutes. (D) Insulin secretion in response to TZIP is similar in control and *Arrb1* <sup>$\beta$ cell-/-</sup> islets in the presence of the GIPR antagonist. iAUC is determined from 25-39 minutes. Each panel depicts results of a representative experiment from at least 2 independent experiments. \* -  $P < 0.05$ , values are mean  $\pm$  SEM. Statistical differences in iAUC values were determined by a 2-tailed student's *t* test.

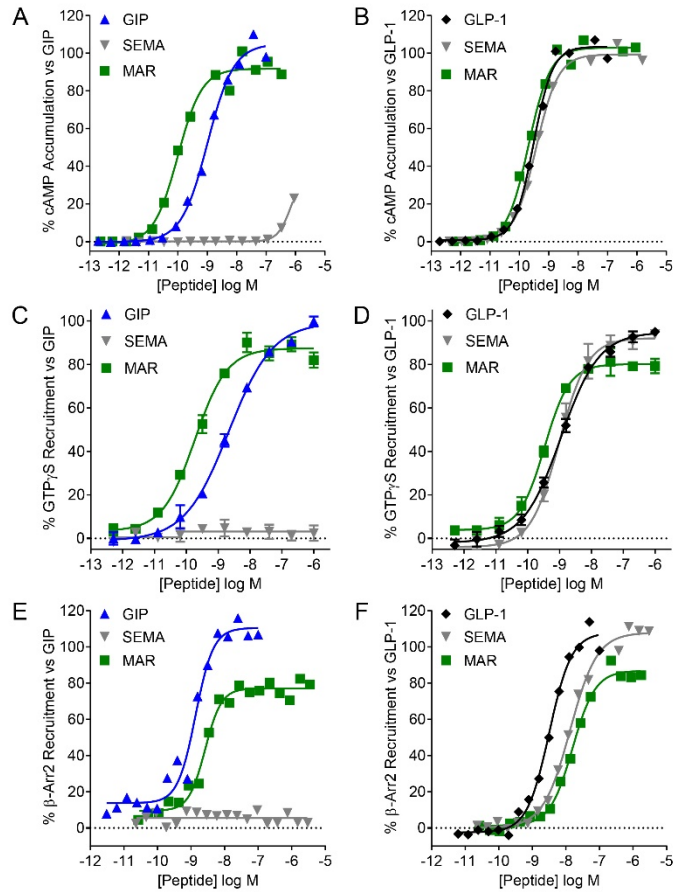

#### Supplemental Figure 4. In Vitro Pharmacology of Comparator Ligands.

The intrinsic activity of semaglutide (SEMA) and NNC00902746 (MAR/MAR709/RG7697) for intracellular cAMP accumulation (**A, B**), agonist stimulated GTP $\gamma$ S binding of G $\alpha_s$  (**C, D**), and recruitment of  $\beta$ -Arr2 (ARRB2) (**E, F**) in comparison to native peptide as previously shown in Figure 1 and Table 1. Graphs are representative curves for summarized data and number of independent experiments, *n*, mentioned below. (**A**) The potency (SEM, *n*) of GIP(1-42) for cAMP accumulation on GIPR is 0.888 nM (0.114, 49). SEMA: >1,000 nM at *n*=10. MAR: 0.130 nM (0.017, 7). (**B**) The potency of GLP-1(7-36) for cAMP accumulation on GLP-1R is 0.366 nM (0.032, 57). SEMA: 0.364 nM (0.068, 9). MAR: 0.248 nM (0.035, 5). (**C**) The potency of GIP(1-42) for GTP recruitment for GIPR is 1.43 nM (0.18, 27). SEMA: >1,000 nM at *n*=2. MAR: 0.182 nM (0.028, 3). (**D**) The potency of GLP-1(7-36) for GTP recruitment for GLP-1R is 1.63 nM (0.21, 26). SEMA: 1.01 nM (0.13, 3). MAR: 0.333 nM (0.045, 3). (**E**) The potency of GIP(1-42) for ARRB2 recruitment to GIPR is 1.58 nM (0.52, 6). SEMA: >10,000 nM at *n*=3. MAR: 2.01 nM (0.31, 3) and is trending toward partial agonism at 79.4% (2.9, 3)

compared to native 118% (11, 6). (**F**) The potency of GLP-1(7-36) for ARRB2 recruitment to GLP-1R is 3.26 nM (0.71, 14). SEMA: 16.8 nM (11.9, *n*=4). MAR: 7.19 nM (3.23, 5).
